# Supplementary material for: Understanding the behaviour of different metals in loaded scintillators: discrepancy between gadolinium and bismuth
Source: Royal Society of Chemistry journal article supplement (doi:10.1039/c5tc00387c), 2015-01-01
Supplement: c5tc00387c1.pdf [file c5tc00387c1.pdf]

# **Understanding the behavior of different metals in loaded scintillators: discrepancy between gadolinium and bismuth**

Guillaume H.V. Bertrand, Jonathan Dumazert, Fabien Sguerra, Romain Coulon, Gwenolé Corre and Matthieu Hamel\*

## **Supporting information**

## **Index**

|                                                                                                                                                                           |    |
|---------------------------------------------------------------------------------------------------------------------------------------------------------------------------|----|
| Experimental: radioluminescence. ....                                                                                                                                     | 3  |
| Table SI1: scintillation yields for each point on the PPO/Bi graph with a $^{137}\text{Cs}$ source .....                                                                  | 3  |
| Table SI2: scintillation yields for each point on the PPO/Gd graph with a $^{137}\text{Cs}$ source .....                                                                  | 4  |
| Figure SI1: Evolution of scintillation yields with various PPO and bismuth concentration. series A to E with a $^{241}\text{Am}$ source .....                             | 5  |
| Figure SI2: Evolution of scintillation yields with various PPO and bismuth concentration. series A to E with a $^{22}\text{Na}$ source .....                              | 5  |
| Figure SI3: Evolution of scintillation yields with various PPO and gadolinium concentration. series F to J with a $^{241}\text{Am}$ source .....                          | 6  |
| Figure SI4: Evolution of scintillation yields with various PPO and gadolinium concentration. series F to J with a $^{22}\text{Na}$ source .....                           | 6  |
| Figure SI5: left. Photo of sample K. 5 wt% bismuth loaded plastic scintillator; right UV response. ....                                                                   | 7  |
| Figure SI6: emission spectra of sample K. 5 wt% bismuth loaded plastic scintillator .....                                                                                 | 7  |
| Figure SI7: radioluminescence of sample K. 5 wt% bismuth loaded plastic scintillator under beta irradiation ( $^{90}\text{Sr}/^{90}\text{Y}$ ) .....                      | 8  |
| Figure SI8: Mean pulse for decay time measurements of sample K. 5 wt% bismuth loaded plastic scintillator .....                                                           | 9  |
| Figure SI9: Pulse height spectra of EJ256-5 wt% lead loaded (black) and sample K. 5 wt% bismuth loaded (red) plastic scintillators with a $^{57}\text{Co}$ source .....   | 9  |
| Figure SI10: Pulse height spectra of EJ256-5 wt% lead loaded (black) and sample K. 5 wt% bismuth loaded (red) plastic scintillators with a $^{137}\text{Cs}$ source ..... | 10 |
| Figure SI11: emission spectra of sample L. 2 wt% gadolinium loaded plastic scintillator .....                                                                             | 10 |
| Figure SI12: radioluminescence of sample L. 2 wt% gadolinium loaded plastic scintillator under beta irradiation ( $^{90}\text{Sr}/^{90}\text{Y}$ ) .....                  | 11 |
| Figure SI13: Mean pulse for decay time measurements of sample L. 2 wt% gadolinium loaded plastic scintillator .....                                                       | 11 |

## Experimental: radioluminescence.

Radioluminescence spectra were acquired by using the following procedure. In the Fluoromax 4P spectrofluorometer (Horiba), the excitation light was shut down. In the center of the experimenter chamber, 90Sr/90Y  $\beta$ -emitting source (25 MBq) was placed at 1 cm away from the scintillator to irradiate the plastic scintillator located close to the detection cell. Spectra were acquired with integration time 5 s/nm. Two types of blank spectra were recorded: one with the plastic scintillator without source and one with the source without scintillator, in order to establish a base line. Plastic scintillator EJ-200 was purchased from Eljen Technology and was used as reference set at 10,000 ph/MeV.

|          | 1       |                                   | 2       |                                   | 3      |                                   | 4      |                                   | 5      |                                    |
|----------|---------|-----------------------------------|---------|-----------------------------------|--------|-----------------------------------|--------|-----------------------------------|--------|------------------------------------|
|          | wt% PPO | Scintillation yields for 0 wt% Bi | wt% PPO | Scintillation yields for 1 wt% Bi | w% PPO | Scintillation yields for 2 wt% Bi | w% PPO | Scintillation yields for 5 wt% Bi | w% PPO | Scintillation yields for 10 wt% Bi |
| <b>A</b> | 0.5     | --                                | 0.5     | <b>0.55</b>                       | 0.5    | <b>0.43</b>                       | 0.5    | <b>0.25</b>                       | 0.5    | <b>0.09</b>                        |
| <b>B</b> | 1       | --                                | 1       | --                                | 1      | <b>0.61</b>                       | 1      | <b>0.30</b>                       | 1      | <b>0.14</b>                        |
| <b>C</b> | 3       | <b>0.79</b>                       | 3       | <b>0.77</b>                       | 3      | <b>0.68</b>                       | 3      | <b>0.39</b>                       | 2      | <b>0.16</b>                        |
| <b>D</b> | 9       | <b>0.90</b>                       | 9       | <b>0.84</b>                       | 9      | <b>0.73</b>                       | 8      | <b>0.49</b>                       | 8      | <b>0.21</b>                        |
| <b>E</b> | 23      | <b>1.00</b>                       | 23      | <b>0.93</b>                       | 22     | <b>0.85</b>                       | 21     | <b>0.69</b>                       | 20     | <b>0.35</b>                        |

Table SI1: scintillation yields for each point on the PPO/Bi graph with a  $^{137}\text{Cs}$  source

|          | 1       |                                   | 2      |                                   | 3       |                                  | 4       |                                   |
|----------|---------|-----------------------------------|--------|-----------------------------------|---------|----------------------------------|---------|-----------------------------------|
|          | PPO wt% | Scintillation yields for 0 wt% Gd | PPO w% | Scintillation yields for 1 wt% Gd | PPO wt% | Scintillation yields for 2wt% Gd | PPO wt% | Scintillation yields 2 for wt% Gd |
| <b>F</b> | 0.5     | --                                | 0.5    | <b>0.37</b>                       | 0.5     | 0.21                             | 0.4     | 0.10                              |
| <b>G</b> | 1       | <b>0.89</b>                       | 1      | <b>0.60</b>                       | 1       | 0.31                             | 1       | 0.10                              |
| <b>H</b> | 3       | <b>0.90</b>                       | 3      | <b>0.73</b>                       | 3       | 0.49                             | 2       | 0.12                              |
| <b>I</b> | 9       | <b>0.97</b>                       | 9      | <b>0.69</b>                       | 8       | 0.45                             | 8       | 0.17                              |
| <b>J</b> | 23      | <b>1.00</b>                       | 22     | <b>0.71</b>                       | 22      | 0.49                             | 20      | 0.17                              |

Table S12: scintillation yields for each point on the PPO/Gd graph with a  $^{137}\text{Cs}$  source

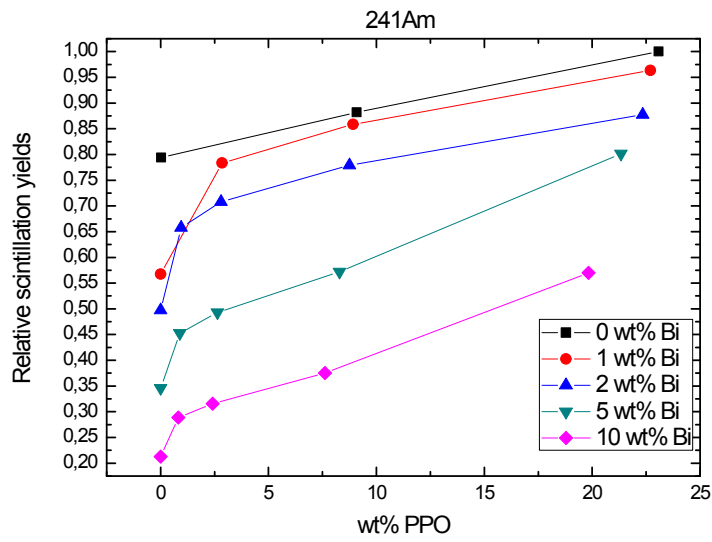

Figure Si1: Evolution of scintillation yields with various PPO and bismuth concentration. series A to E with a  $^{241}\text{Am}$  source

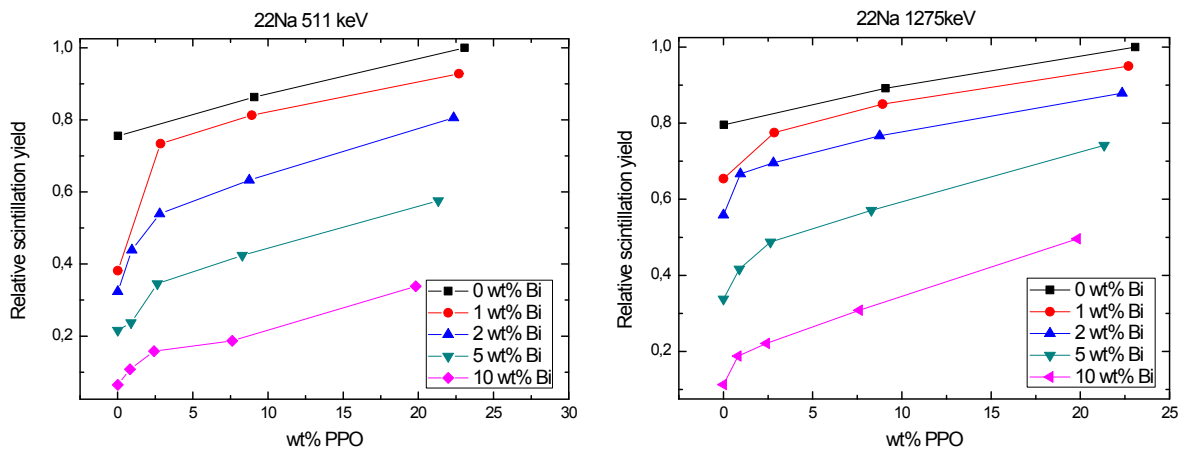

Figure Si2: Evolution of scintillation yields with various PPO and bismuth concentration. series A to E with a  $^{22}\text{Na}$  source

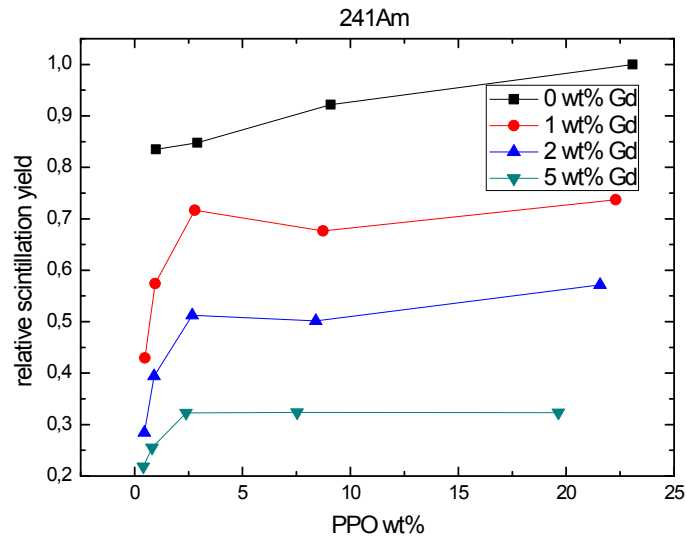

Figure Si3: Evolution of scintillation yields with various PPO and gadolinium concentration. series F to J with a  $^{241}\text{Am}$  source

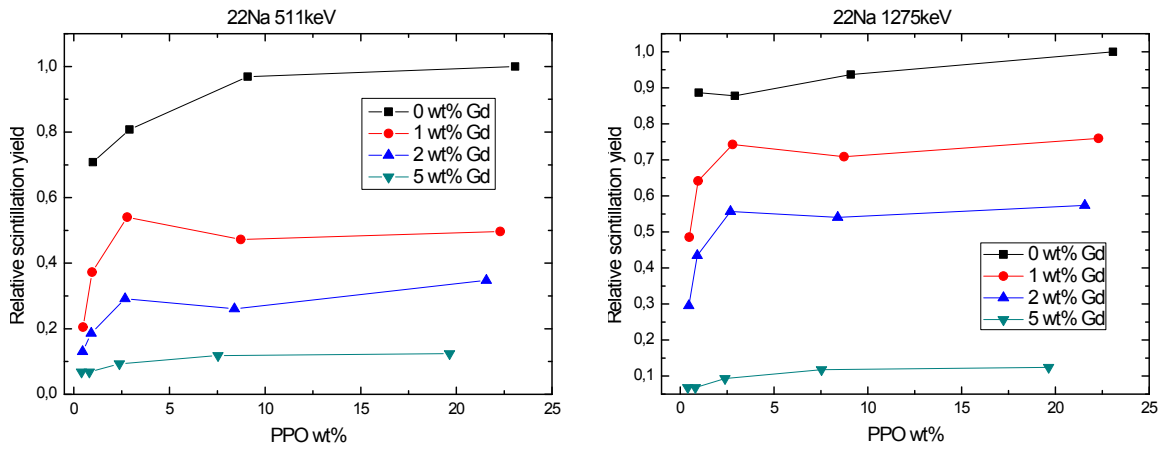

Figure Si4: Evolution of scintillation yields with various PPO and gadolinium concentration. series F to J with a  $^{22}\text{Na}$  source

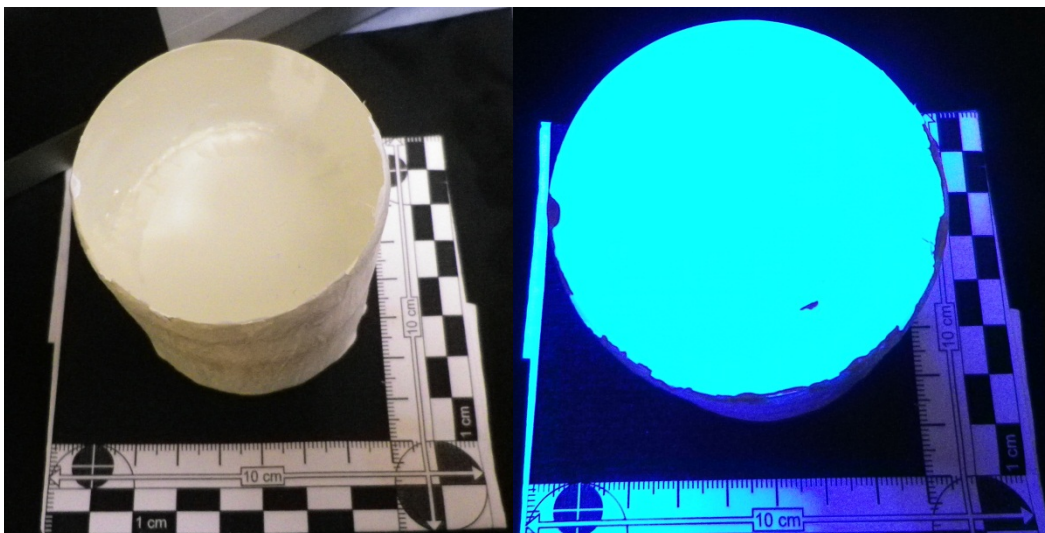

Figure S15: left. Photo of sample K. 5 wt% bismuth loaded plastic scintillator; right UV response.

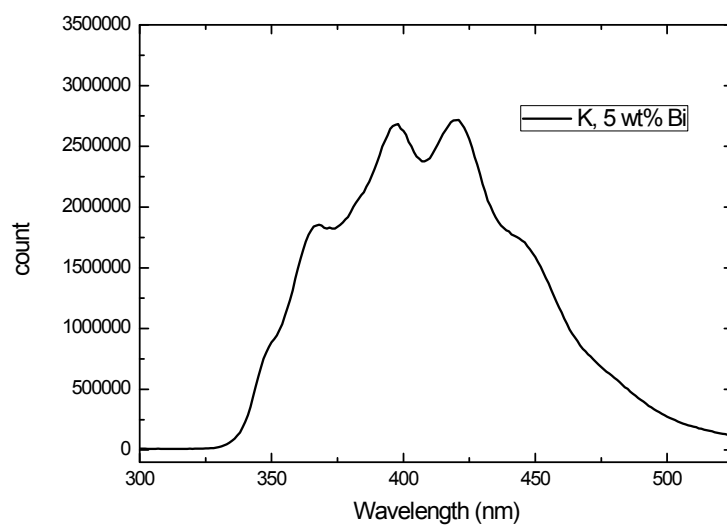

Figure S16: emission spectra of sample K. 5 wt% bismuth loaded plastic scintillator

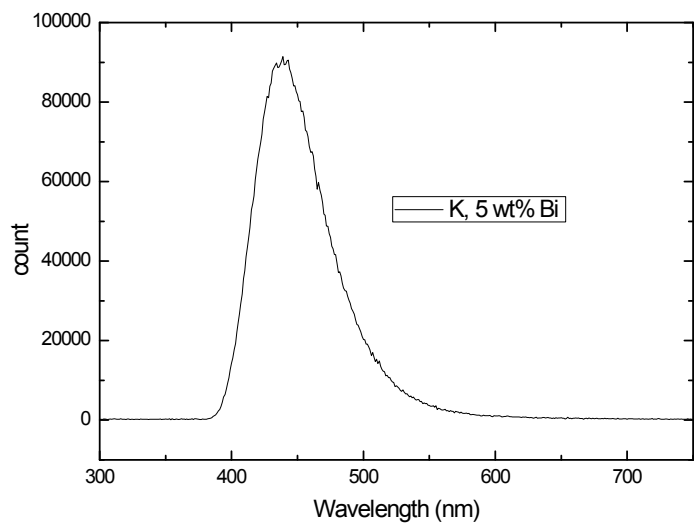

Figure S17: radioluminescence of sample K. 5 wt% bismuth loaded plastic scintillator under beta irradiation (90Sr/90Y)

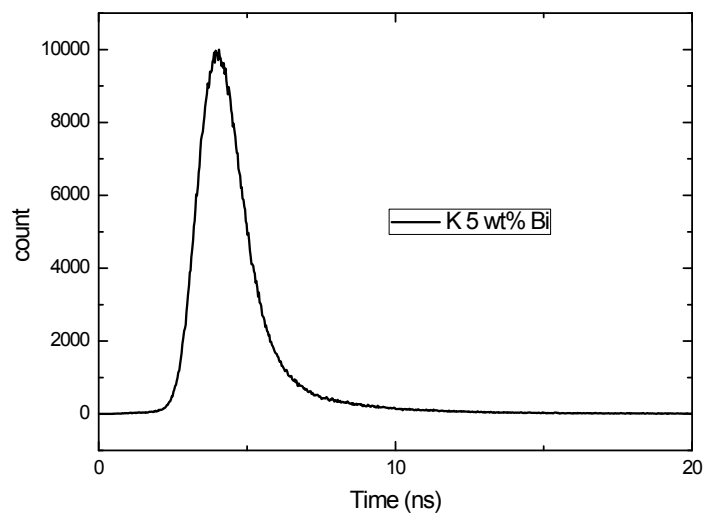



Figure SI8: Mean pulse for decay time measurements of sample K. 5 wt% bismuth loaded plastic scintillator

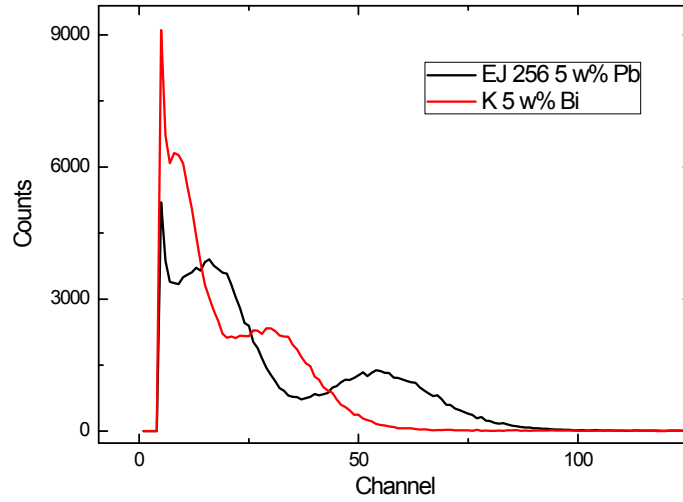

Figure SI9: Pulse height spectra of EJ256-5 wt% lead loaded (black) and sample K. 5 wt% bismuth loaded (red) plastic scintillators with a  $^{57}\text{Co}$  source

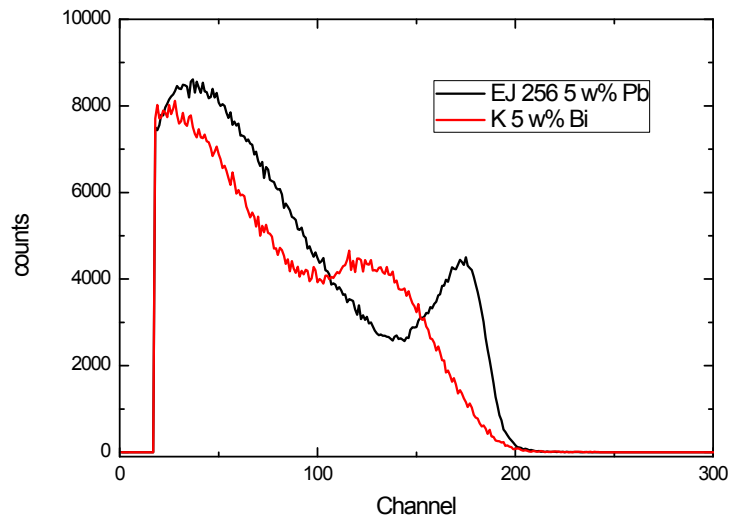

Figure SI10: Pulse height spectra of EJ256-5 wt% lead loaded (black) and sample K. 5 wt% bismuth loaded (red) plastic scintillators with a  $^{137}\text{Cs}$  source

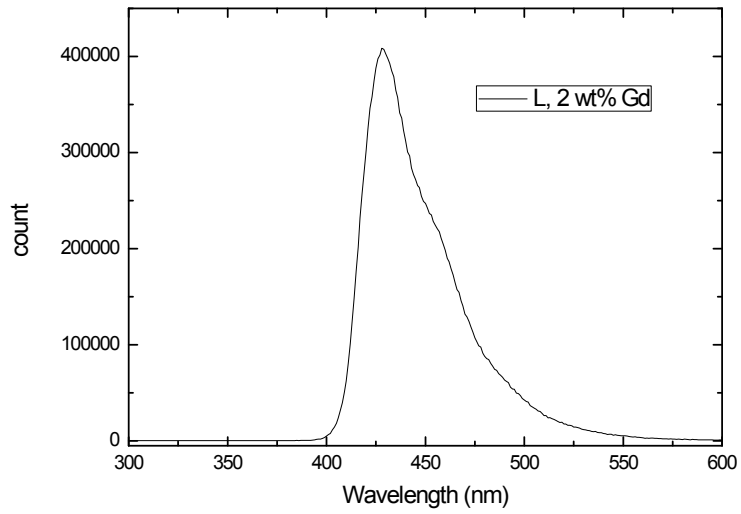

Figure SI11: emission spectra of sample L. 2 wt% gadolinium loaded plastic scintillator

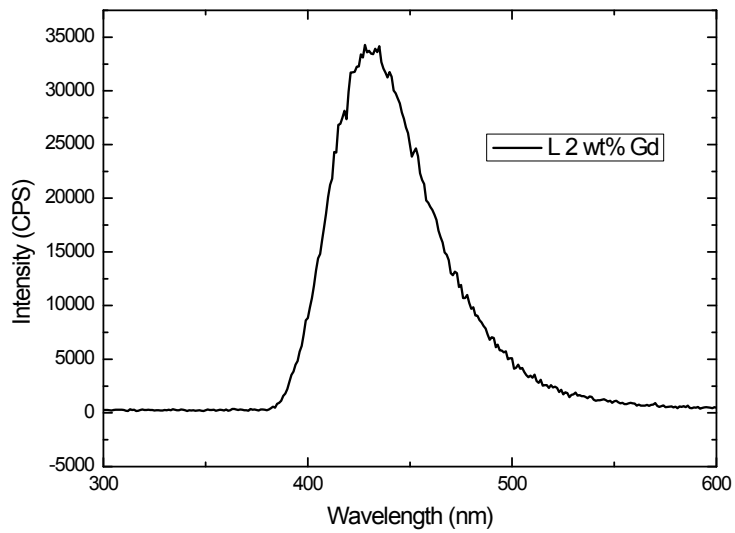

Figure SI12: radioluminescence of sample L. 2 wt% gadolinium loaded plastic scintillator under beta irradiation (90Sr/90Y)

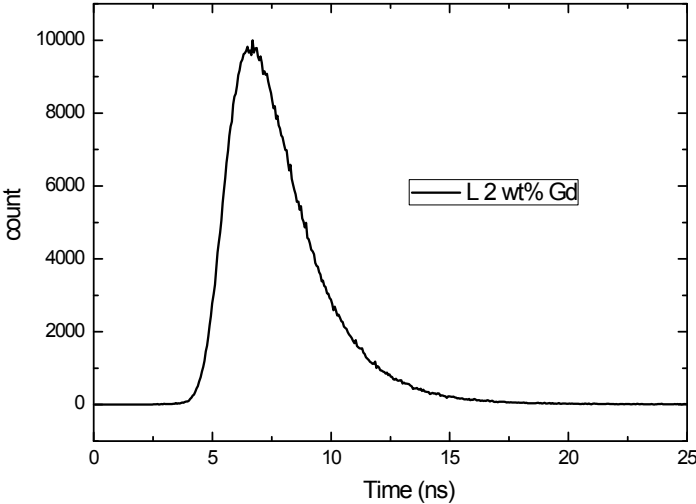

Figure SI13: Mean pulse for decay time measurements of sample L. 2 wt% gadolinium loaded plastic scintillator
